# Supplementary material
Source: Springer Nature journal article supplement (https://www.springermedizin.de/resource/supplementary/12889_2011_4172_MOESM1_ESM.pdf/9491514)

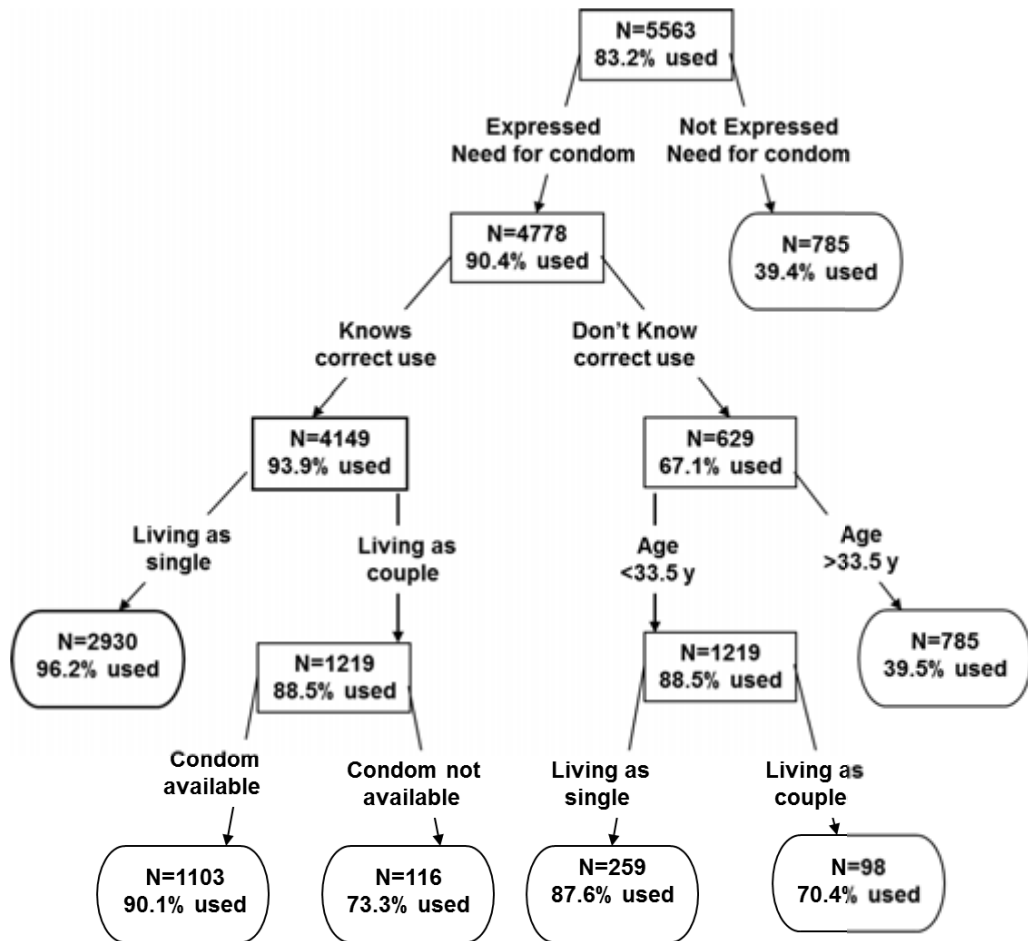

Supplement: MOESM1 [file 9491514]
